# Supplementary material
Source: Springer Nature journal article supplement (https://www.springermedizin.de/resource/supplementary/12874_2010_564_MOESM6_ESM.pdf/9432462)

$i^2$  with 90% reference interval

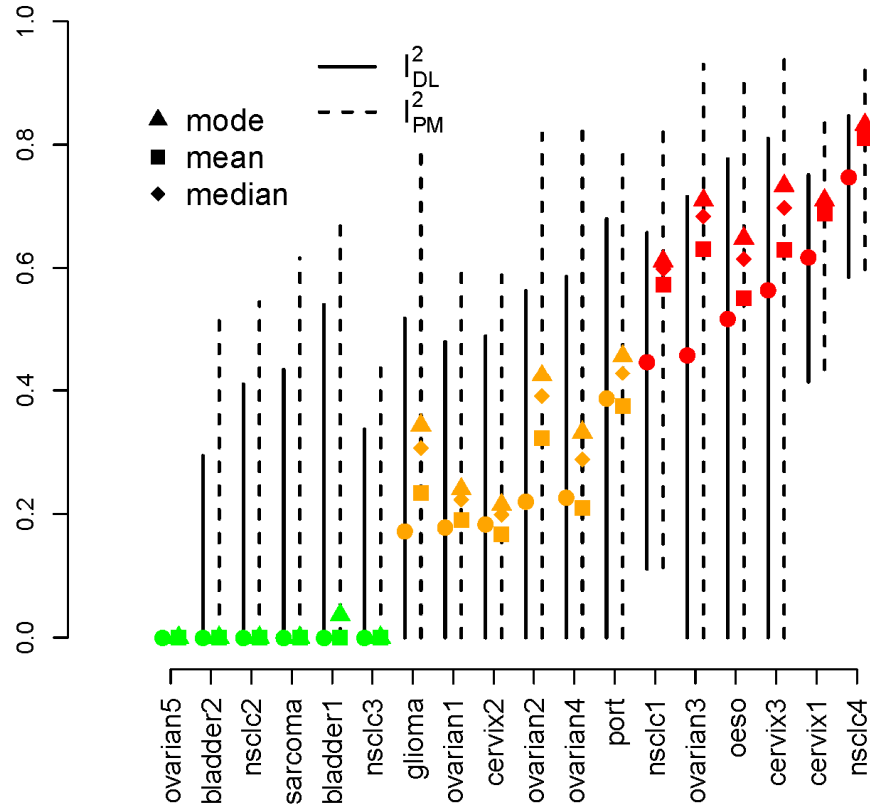

Coverage

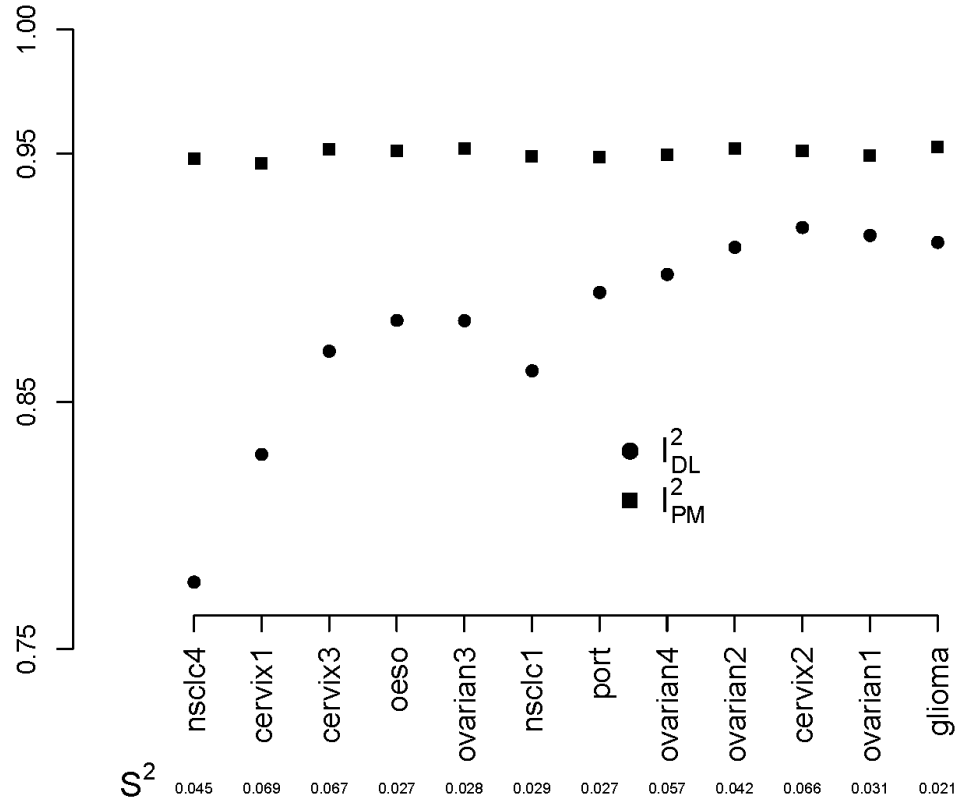

Supplement: MOESM6 [file 9432462]
